# Supplementary material for: The role of children in the transmission of SARS-CoV2: updated rapid review
Source: PubMed Central journal article supplement (PMC7719356; doi:10.7189/jogh.10.021101), 2020-12
Supplement: jogh-10-021101-s001.pdf [file jogh-10-021101-s001.pdf]

---

## Appendix

### Search Strategy:

PubMed

Date of search: 2020-06-21

Schools[mh:noexp] OR schools, nursery[mh] OR "Child Day Care Centers"[mh] OR "Nurseries, Infant"[mh] OR school[tiab] OR schools[tiab] OR preschools[tiab] OR preschool[tiab] OR "pre school"[tiab] OR "pre schools"[tiab] OR nursery[tiab] OR nurseries[tiab] OR kindergarten[tiab] OR (("day care" OR daycare) AND (child\* OR infant\*)) OR pediatric[tiab] OR paediatric[tiab] OR child[tiab] OR children[tiab] OR schoolchild\*[tiab] OR young\*[tiab] OR teen\*[tiab] OR adolescen\*

AND

"Betacoronavirus"[Mesh] OR "Coronavirus Infections"[MH] OR "Spike Glycoprotein, COVID-19 Virus"[NM] OR "COVID-19"[NM] OR "Coronavirus"[MH] OR "Severe Acute Respiratory Syndrome Coronavirus 2"[NM] OR 2019nCoV[ALL] OR Betacoronavirus\*[ALL] OR Corona Virus\*[ALL] OR Coronavirus\*[ALL] OR Coronovirus\*[ALL] OR CoV[ALL] OR CoV2[ALL] OR COVID[ALL] OR COVID19[ALL] OR COVID-19[ALL] OR HCoV-19[ALL] OR nCoV[ALL] OR "SARS CoV 2"[ALL] OR SARS2[ALL] OR SARSCoV[ALL] OR SARS-CoV[ALL] OR SARS-CoV-2[ALL] OR Severe Acute Respiratory Syndrome CoV\*[ALL]

**WHO COVID-19 database** <https://search.bvsalud.org/global-literature-on-novel-coronavirus-2019-ncov/>

Date of search: 2020-06-21

(tw:(child\* OR infan\* OR baby OR babies OR pediatric OR paediatric OR young\* OR teen\* OR adolescen\* OR school\* OR nurser\* OR preschool\* OR pre-school\* OR kindergarten\*)) AND (entry\_date:202004\*)

**medRxiv** via <https://mcguinlu.shinyapps.io/medrxivr/>

Date of search: 2020-06-21

*Covid-19 cluster combined with OR:*

COVID-19

[Cc]oronavirus

SARS-CoV-2

2019-nCoV

*Population cluster combined with OR:*

---

[Cc]hild

[li]nfan

[Bb]aby

[Bb]abies

[Pp]ediatric

[Pp]aediatic

[Yy]oung

[Tt]een

[Aa]dolescen

[Ss]chool

[Nn]urser

[Pp]reschool

[Pp]re-school

[Kk]indergarten

**Supplementary Table S1. Data sources reporting the proportion of childhood infection of COVID.**

| Country             | Data source            | No of COVID cases | No of pediatric cases | Proportion of childhood infection | Data link                                                                                                                                                                                                                                                                                                                                                                                                             |
|---------------------|------------------------|-------------------|-----------------------|-----------------------------------|-----------------------------------------------------------------------------------------------------------------------------------------------------------------------------------------------------------------------------------------------------------------------------------------------------------------------------------------------------------------------------------------------------------------------|
| Algeria             | Website                | 17348             | 429                   | 0.0247                            | <a href="http://covid19.cipalgerie.com/fr/statistiques-detaillees-covid-19-algerie/">http://covid19.cipalgerie.com/fr/statistiques-detaillees-covid-19-algerie/</a>                                                                                                                                                                                                                                                   |
| Argentina           | Website                | 87017             | 11983                 | 0.1377                            | <a href="https://www.argentina.gob.ar/salud/coronavirus-COVID-19/sala-situacion">https://www.argentina.gob.ar/salud/coronavirus-COVID-19/sala-situacion</a>                                                                                                                                                                                                                                                           |
| Australia           | Report                 | 5805              | 190                   | 0.0327                            | <a href="https://www1.health.gov.au/internet/main/publishing.nsf/Content/1D03BCB527F40C8BCA258503000302EB/\$File/covid_19_australia_epidemiology_report_10_reporting_week_ending_23_59_aest_5_april_2020.pdf">https://www1.health.gov.au/internet/main/publishing.nsf/Content/1D03BCB527F40C8BCA258503000302EB/\$File/covid_19_australia_epidemiology_report_10_reporting_week_ending_23_59_aest_5_april_2020.pdf</a> |
| Austria             | Website                | 18548             | 778                   | 0.0419                            | <a href="https://info.gesundheitsministerium.at/dashboard_Epidem.html?l=de">https://info.gesundheitsministerium.at/dashboard_Epidem.html?l=de</a>                                                                                                                                                                                                                                                                     |
| Canada              | Report                 | 24804             | 721                   | 0.0291                            | <a href="https://www.canada.ca/content/dam/phac-aspc/documents/services/diseases/2019-novel-coronavirus-infection/surv-covid19-epi-update-2020-04-13-eng.pdf">https://www.canada.ca/content/dam/phac-aspc/documents/services/diseases/2019-novel-coronavirus-infection/surv-covid19-epi-update-2020-04-13-eng.pdf</a>                                                                                                 |
| China               | Population-based       | 44672             | 965                   | 0.0216                            | Wu-2020 (DOI: 10.1093/cid/ciaa557 )                                                                                                                                                                                                                                                                                                                                                                                   |
| Colombia            | Website                | 2852              | 178                   | 0.0624                            | <a href="https://www.ins.gov.co/Noticias/Paginas/Coronavirus.aspx">https://www.ins.gov.co/Noticias/Paginas/Coronavirus.aspx</a>                                                                                                                                                                                                                                                                                       |
| Denmark             | Report                 | 6496              | 236                   | 0.0363                            | <a href="https://files.ssi.dk/COVID19-overvaagningsrapport-14042020-wgkv">https://files.ssi.dk/COVID19-overvaagningsrapport-14042020-wgkv</a>                                                                                                                                                                                                                                                                         |
| Ecuador             | Report                 | 7466              | 379                   | 0.0508                            | <a href="https://www.salud.gob.ec/wp-content/uploads/2020/04/Boletin-045-AM_Nacional.pdf">https://www.salud.gob.ec/wp-content/uploads/2020/04/Boletin-045-AM_Nacional.pdf</a>                                                                                                                                                                                                                                         |
| Estonia             | Website                | 1332              | 47                    | 0.0353                            | <a href="https://www.terviseamet.ee/et/koroonaviirus/koroonakaart">https://www.terviseamet.ee/et/koroonaviirus/koroonakaart</a>                                                                                                                                                                                                                                                                                       |
| Finland             | Website                | 3064              | 204                   | 0.0666                            | <a href="https://thl.fi/en/web/infectious-diseases-and-vaccinations/what-s-new/coronavirus-covid-19-latest-updates">https://thl.fi/en/web/infectious-diseases-and-vaccinations/what-s-new/coronavirus-covid-19-latest-updates</a>                                                                                                                                                                                     |
| France              | Hospital-based         | 9728              | 382                   | 0.0393                            | Levy, C.-2020 (DOI: 10.1101/2020.05.18.20098863)                                                                                                                                                                                                                                                                                                                                                                      |
| Germany             | Website                | 197783            | 8378                  | 0.0424                            | <a href="https://experience.arcgis.com/experience/478220a4c454480e823b17327b2bf1d4/page/page_0/">https://experience.arcgis.com/experience/478220a4c454480e823b17327b2bf1d4/page/page_0/</a>                                                                                                                                                                                                                           |
| Greece              | Report                 | 743               | 27                    | 0.0363                            | <a href="https://eody.gov.gr/wp-content/uploads/2020/03/covid-gr-daily-report-20200324.pdf">https://eody.gov.gr/wp-content/uploads/2020/03/covid-gr-daily-report-20200324.pdf</a>                                                                                                                                                                                                                                     |
| Iceland             | Website                | 1810              | 180                   | 0.0994                            | <a href="https://www.covid.is/data">https://www.covid.is/data</a>                                                                                                                                                                                                                                                                                                                                                     |
| Iran                | Hospital-based         | 2964              | 10                    | 0.0034                            | Nikpouraghdam, M.-2020 (DOI: 10.1016/j.jcv.2020.104378 )                                                                                                                                                                                                                                                                                                                                                              |
| Ireland             | Website                | 9484              | 115                   | 0.0121                            | <a href="https://www.gov.ie/en/publication/b86091-an-analysis-of-the-836-cases-of-covid-19-in-ireland-as-of-saturday-2/#age-range-affected">https://www.gov.ie/en/publication/b86091-an-analysis-of-the-836-cases-of-covid-19-in-ireland-as-of-saturday-2/#age-range-affected</a>                                                                                                                                     |
| Japan               | Population-based       | 294               | 10                    | 0.0340                            | Mizumoto-2020 (DOI: 10.1101/2020.03.09.20033142)                                                                                                                                                                                                                                                                                                                                                                      |
| Kazakhstan          | Population-based study | 1295              | 80                    | 0.0618                            | Kemelbekov, K.-2020 (https://doi.org/10.29333/ejgm/8268)                                                                                                                                                                                                                                                                                                                                                              |
| Netherlands         | Website                | 27419             | 410                   | 0.0150                            | <a href="https://www.rivm.nl/coronavirus-covid-19/grafieken">https://www.rivm.nl/coronavirus-covid-19/grafieken</a>                                                                                                                                                                                                                                                                                                   |
| New Zealand         | Website                | 1540              | 159                   | 0.1032                            | <a href="https://www.health.govt.nz/our-work/diseases-and-conditions/covid-19-novel-coronavirus/covid-19-current-situation/covid-19-current-cases">https://www.health.govt.nz/our-work/diseases-and-conditions/covid-19-novel-coronavirus/covid-19-current-situation/covid-19-current-cases</a>                                                                                                                       |
| Norway              | Website                | 6623              | 353                   | 0.0533                            | <a href="https://www.vg.no/spesial/2020/corona/">https://www.vg.no/spesial/2020/corona/</a>                                                                                                                                                                                                                                                                                                                           |
| Pakistan            | Website                | 5496              | 374                   | 0.0680                            | <a href="http://covid.gov.pk/stats/pakistan">http://covid.gov.pk/stats/pakistan</a>                                                                                                                                                                                                                                                                                                                                   |
| Republic of Korea   | Population-based       | 7755              | 480                   | 0.0619                            | Choe-2020 (DOI: 10.1101/2020.03.15.20036368)                                                                                                                                                                                                                                                                                                                                                                          |
| Republic of Moldova | Website                | 18471             | 1207                  | 0.0653                            | <a href="http://gismoldova.maps.arcgis.com/apps/opsdashboard/index.html#/d274da857ed345efa66e1fbc959b021b">http://gismoldova.maps.arcgis.com/apps/opsdashboard/index.html#/d274da857ed345efa66e1fbc959b021b</a>                                                                                                                                                                                                       |

|              |                  |        |      |        |                                                                                                                                                                                                                                                                                                                                                                                                                                                                                                                                   |
|--------------|------------------|--------|------|--------|-----------------------------------------------------------------------------------------------------------------------------------------------------------------------------------------------------------------------------------------------------------------------------------------------------------------------------------------------------------------------------------------------------------------------------------------------------------------------------------------------------------------------------------|
| South Africa | Population-based | 3144   | 134  | 0.0426 | National Institute for Communicable Diseases, South Africa-2020 ( <a href="https://www.nicd.ac.za/covid-19-update-46/">https://www.nicd.ac.za/covid-19-update-46/</a> )                                                                                                                                                                                                                                                                                                                                                           |
| Spain        | Website          | 135032 | 349  | 0.0026 | <a href="https://www.isciii.es/QueHacemos/Servicios/VigilanciaSaludPublicaRENAVE/EnfermedadesTransmisibles/Documents/INFORMES/Informes%20COVID-19/Informe%20n%C2%BA%2021.%20Situaci%C3%B3n%20de%20COVID-19%20en%20Espa%C3%B1a%20a%206%20de%20abril%20de%202020.pdf">https://www.isciii.es/QueHacemos/Servicios/VigilanciaSaludPublicaRENAVE/EnfermedadesTransmisibles/Documents/INFORMES/Informes%20COVID-19/Informe%20n%C2%BA%2021.%20Situaci%C3%B3n%20de%20COVID-19%20en%20Espa%C3%B1a%20a%206%20de%20abril%20de%202020.pdf</a> |
| Sweden       | Website          | 74072  | 3316 | 0.0448 | <a href="https://platz.se/coronavirus/">https://platz.se/coronavirus/</a>                                                                                                                                                                                                                                                                                                                                                                                                                                                         |
| Switzerland  | Website          | 32341  | 1239 | 0.0383 | <a href="https://covid-19-schweiz.bagapps.ch/fr-1.html">https://covid-19-schweiz.bagapps.ch/fr-1.html</a>                                                                                                                                                                                                                                                                                                                                                                                                                         |
